# Supplementary material for: A Search for Snail-Related Answers to Explain Differences in Response of Schistosoma mansoni to Praziquantel Treatment among Responding and Persistent Hotspot Villages along the Kenyan Shore of Lake Victoria
Source: PubMed Central journal article supplement (PMC6609173; doi:10.4269/ajtmh.19-0089), 2019-06-03
Supplement: tpmd190089.SD1.pdf [file tpmd190089.SD1.pdf]

**Supplementary Table 1: Number of *B. sudanica* snails collected from each village and number of snails infected with *S. mansoni* or other trematode cercariae. SM = *Schistosoma mansoni*, ECH = echinostomes, AMPH = amphistomes, STRIG = strigeids, XIPH = xiphidiocercariae, SM:ECH = ratio of *S. mansoni* to echinostomes.**

| <b>VILLAGE</b>                     | Total Snails | SM | ECH | AMPH | STRIG | XIPH | Total Number of Infected Snails | Trematode Prevalence |
|------------------------------------|--------------|----|-----|------|-------|------|---------------------------------|----------------------|
| <b>Persistent Hotspot Villages</b> |              |    |     |      |       |      |                                 |                      |
| MINYA                              | 1280         | 1  | 5   | 0    | 0     | 19   | 25                              | 2.0                  |
| AGOK                               | 429          | 7  | 4   | 0    | 1     | 7    | 19                              | 4.4                  |
| MIGIRO                             | 860          | 1  | 5   | 0    | 1     | 6    | 13                              | 1.5                  |
| MIYANDHE                           | 151          | 0  | 1   | 0    | 1     | 0    | 2                               | 1.3                  |
| KANYIBOK                           | 1304         | 28 | 22  | 7    | 4     | 1    | 62                              | 4.8                  |
| USENGE                             | 1322         | 23 | 10  | 6    | 12    | 14   | 65                              | 4.9                  |
| <b>TOTAL</b>                       | 5346         | 60 | 47  | 13   | 19    | 47   | 186                             | 3.5                  |
| <b>%</b>                           |              | 32 | 25  | 7    | 10    | 25   |                                 |                      |
| <b>Responding Villages</b>         |              |    |     |      |       |      |                                 |                      |
| KOTIENO                            | 1323         | 18 | 29  | 7    | 17    | 2    | 73                              | 5.5                  |
| SEKA DOK                           | 1296         | 3  | 10  | 2    | 4     | 1    | 20                              | 1.5                  |
| WETA                               | 1319         | 0  | 13  | 1    | 6     | 15   | 35                              | 2.7                  |
| MUMBO                              | 965          | 2  | 13  | 1    | 2     | 4    | 22                              | 2.3                  |
| <b>TOTAL</b>                       | 4903         | 23 | 65  | 11   | 29    | 22   | 150                             | 3.1                  |
| <b>%</b>                           |              | 15 | 43  | 7    | 19    | 15   |                                 |                      |
